# Supplementary material
Source: HighWire-hosted journal article supplement (https://cmaj.ca/highwire/filestream/148531/field_highwire_adjunct_files/0/220827-image-1-at.pdf)
Supplement: 220827-image-1-at.pdf [file 220827-image-1-at.pdf]

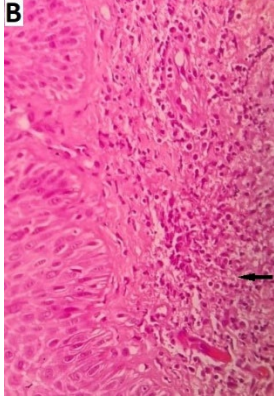

Photomicrograph showing intense neutrophilic dermal infiltrate in reticular dermis along with microabscess formation (arrow) (H&E 40X).
